# Supplementary material for: The many-body expansion for aqueous systems revisited: III. Hofmeister ion–water interactions
Source: Royal Society of Chemistry journal article supplement (doi:10.1039/d1cp00409c), 2021-01-01
Supplement: d1cp00409c1.pdf [file d1cp00409c1.pdf]

## SUPPORTING INFORMATION

### **The many-body expansion for aqueous systems revisited:**

#### **III. Hofmeister ion – water interactions**

Kristina M. Herman,<sup>a</sup> Joseph P. Heindel<sup>a</sup> and Sotiris S. Xantheas<sup>a, b, \*</sup>

<sup>a</sup> Department of Chemistry, University of Washington, Seattle, WA 98195, USA

<sup>b</sup> Advanced Computing, Mathematics and Data Division, Pacific Northwest National Laboratory,  
902 Battelle Boulevard, P.O. Box 999, MS K1-83, WA, 99352, USA

---

\* Corresponding author. Email: [sotiris.xantheas@pnnl.gov](mailto:sotiris.xantheas@pnnl.gov) and [xantheas@uw.edu](mailto:xantheas@uw.edu)

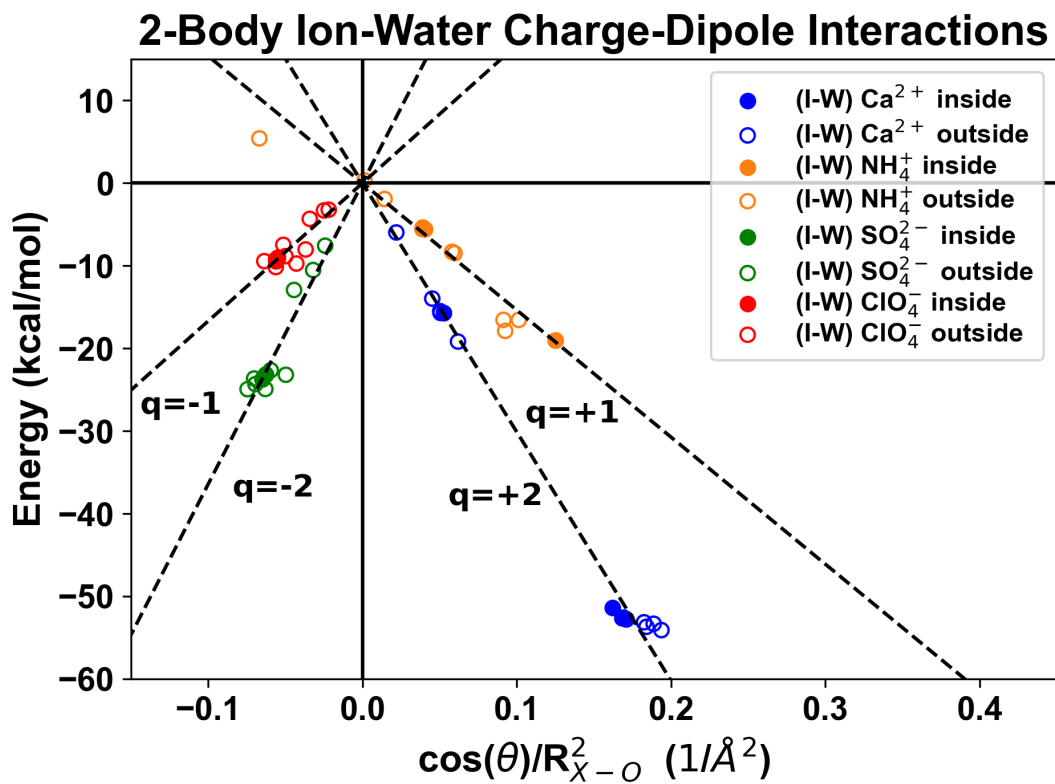

**Figure FS1.** Same as Figure 4 but not scaled for charge ( $x$ -axis is  $\cos(\theta)/R_{X-O}^2$ ). Note the emergence of the different lines for  $q = -2, -1, +1, +2$ .

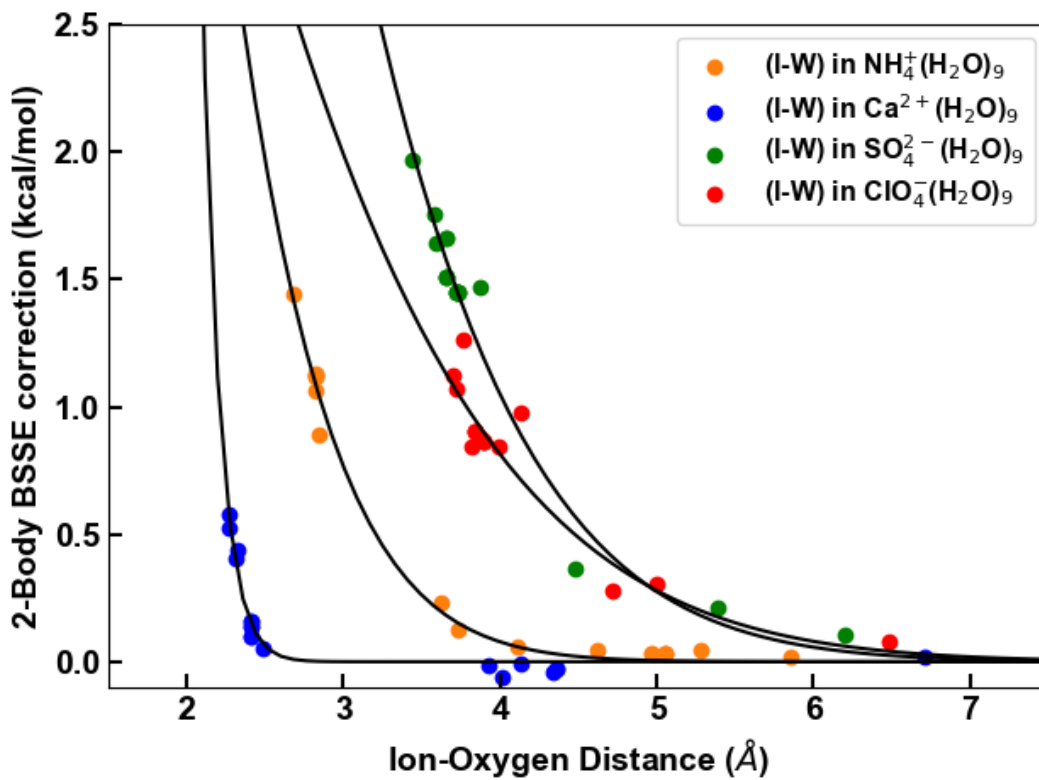

**Figure FS2.** Unscaled 2-B (I-W) and (W-W) contributions to the total BSSE correction for  $Z^{+/-}(\text{H}_2\text{O})_9$ , where  $Z = \text{Ca}^{2+}, \text{NH}_4^+, \text{SO}_4^{2-}, \text{ClO}_4^-$  and their fits (solid lines) to Equation (8).

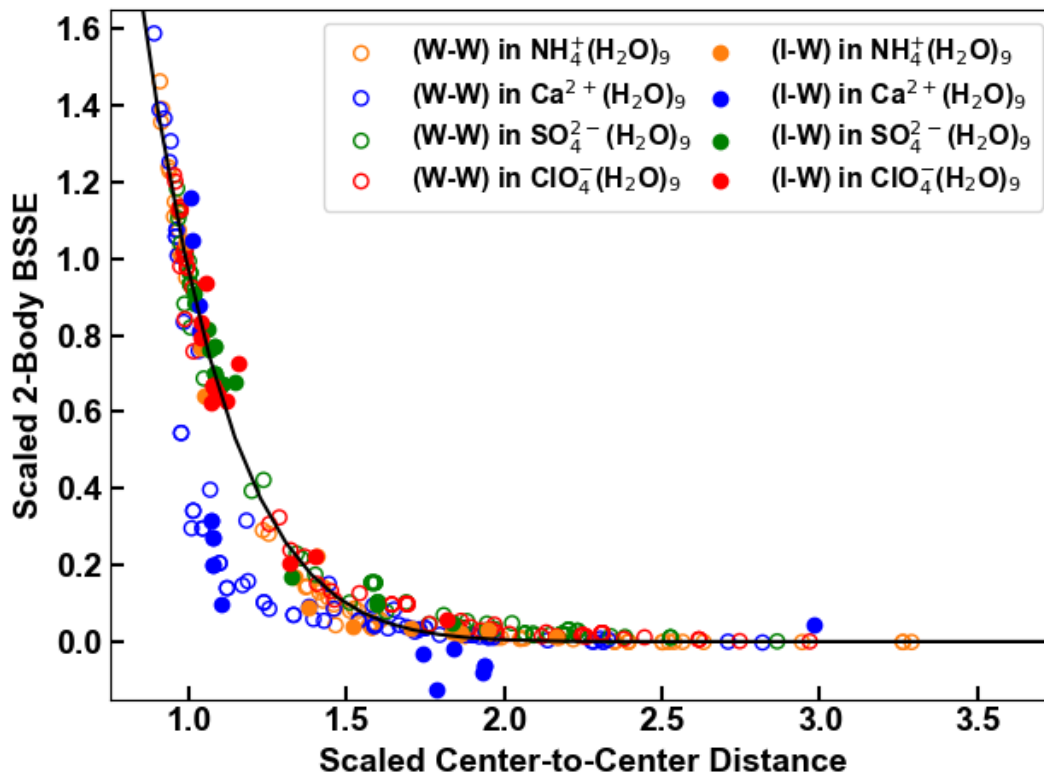

**Figure FS3.** Scaled 2-B (I-W) and (W-W) contributions to the total BSSE correction for  $Z^{+/-}(\text{H}_2\text{O})_9$ , where  $Z = \text{Ca}^{2+}, \text{NH}_4^+, \text{SO}_4^{2-}, \text{ClO}_4^-$  and their fit (solid line, excluding calcium) to Equation (8). These points are comprised of 288 water dimer and 72 ion-water pairs. The points from  $\text{NH}_4^+, \text{SO}_4^{2-}, \text{ClO}_4^-$  fit to a nearly identical trend (equation (8),  $a = 12.62, b = 1.25$  and  $R^2 = 0.9888$ ) whereas the points from  $\text{Ca}^{2+}$  decay more quickly (equation (8),  $a = 141.22, b = 1.99$  and  $R^2 = 0.8957$ ).

**Table TS1.** Magnitude (kcal/mol) of BSSE-uncorrected MB terms at the MP2/aVDZ level of theory. The numbers in parentheses correspond to the percentage of the total energy.

| <i>k</i>     | $\text{Ca}^{2+}(\text{H}_2\text{O})_9$ |                 | $\text{NH}_4^+(\text{H}_2\text{O})_9$ |                | $\text{SO}_4^{2-}(\text{H}_2\text{O})_9$ |                 | $\text{ClO}_4^-(\text{H}_2\text{O})_9$ |        |                |
|--------------|----------------------------------------|-----------------|---------------------------------------|----------------|------------------------------------------|-----------------|----------------------------------------|--------|----------------|
|              | Ion Inside                             | Ion Outside     | Ion Inside                            | Ion Outside    | Ion Inside                               | Ion Outside     | Ion                                    | Inside | Ion Outside    |
| 1-B          | 0.81 (-0.3)                            | 3.42 (-1.2)     | 0.41 (-0.4)                           | 3.83 (-2.8)    | 3.24 (-1.6)                              | 5.11 (-2.6)     | 1.08 (-1.0)                            |        | 2.58 (-2.3)    |
| 2-B          | -387.36 (124.2)                        | -306.33 (106.3) | -121.09 (105.6)                       | -128.76 (95.8) | -236.97 (118.7)                          | -215.03 (110.0) | -113.18 (107.2)                        |        | -112.56 (99.7) |
| 3-B          | 85.84 (-27.5)                          | 11.08 (-3.8)    | 4.40 (-3.8)                           | -8.09 (6.0)    | 40.62 (-20.3)                            | 16.44 (-8.4)    | 8.88 (-8.4)                            |        | -1.36 (1.2)    |
| 4-B          | -12.24 (3.9)                           | 4.78 (-1.7)     | 1.74 (-1.5)                           | -2.25 (1.7)    | -7.69 (3.9)                              | -3.38 (1.7)     | -2.72 (2.6)                            |        | -2.76 (2.4)    |
| 5-B          | 2.38 (-0.8)                            | -0.38 (0.1)     | -0.12 (0.1)                           | 1.70 (-1.3)    | 1.21 (-0.6)                              | 2.18 (-1.1)     | 0.65 (-0.6)                            |        | 1.67 (-1.5)    |
| 6-B          | -2.53 (0.8)                            | -1.03 (0.4)     | 0.02 (-0.0)                           | -1.41 (1.0)    | -0.02 (0.0)                              | -1.08 (0.6)     | -0.40 (0.4)                            |        | -0.76 (0.7)    |
| 7-B          | 1.66 (-0.5)                            | 0.47 (-0.2)     | -0.01 (0.0)                           | 0.87 (-0.6)    | -0.03 (0.0)                              | 0.35 (-0.2)     | 0.20 (-0.2)                            |        | 0.30 (-0.3)    |
| 8-B          | -0.46 (0.1)                            | -0.07 (0.0)     | 0.001 (-0.0)                          | -0.39 (0.3)    | -0.03 (0.0)                              | -0.08 (0.0)     | -0.05 (0.0)                            |        | -0.08 (0.1)    |
| 9-B          | 0.03 (-0.0)                            | 0.02 (0.0)      | 0.001 (-0.0)                          | 0.10 (-0.1)    | -0.001 (0.0)                             | 0.02 (-0.0)     | 0.001 (-0.0)                           |        | 0.02 (-0.0)    |
| 10-B         | 0.000 (0.0)                            | -0.007 (0.0)    | 0.000 (0.0)                           | -0.01 (0.0)    | 0.006 (-0.0)                             | -0.004 (0.0)    | 0.002 (-0.0)                           |        | -0.003 (0.0)   |
| <b>Total</b> | <b>-311.86</b>                         | <b>-288.05</b>  | <b>-114.65</b>                        | <b>-134.43</b> | <b>-199.66</b>                           | <b>-195.47</b>  | <b>-105.55</b>                         |        | <b>-112.95</b> |

**Table TS2.** Decomposition of the MBE (1-B to 10-B) terms into ion-water (I-W-...-W) and water-water (W-W-...-W) contributions (kcal/mol). Parentheses indicate the percentage of each contribution to the total magnitude of the MB terms listed in Table TS1.

| <i>k</i>     | $\text{Ca}^{2+}(\text{H}_2\text{O})_9$ |                     |                       |                     | $\text{NH}_4^+(\text{H}_2\text{O})_9$ |                    |                      |                     |
|--------------|----------------------------------------|---------------------|-----------------------|---------------------|---------------------------------------|--------------------|----------------------|---------------------|
|              | Ion Inside                             |                     | Ion Outside           |                     | Ion Inside                            |                    | Ion Outside          |                     |
|              | I-W                                    | W-W                 | I-W                   | W-W                 | I-W                                   | W-W                | I-W                  | W-W                 |
| 1-B          | 0.00 (0.0)                             | 0.81 (100.0)        | 0.00 (0.0)            | 3.42 (100.0)        | 0.13 (31.7)                           | 0.28 (68.3)        | 0.88 (23.0)          | 2.95 (77.0)         |
| 2-B          | -399.56 (103.1)                        | 12.20 (-3.1)        | -286.44 (93.5)        | -19.89 (6.5)        | -107.88 (89.1)                        | -13.21 (10.9)      | -73.46 (57.0)        | -55.31 (43.0)       |
| 3-B          | 88.05 (102.6)                          | -2.21 (-2.6)        | 8.45 (76.3)           | 2.63 (23.7)         | 1.30 (29.5)                           | 3.10 (70.5)        | 3.88 (-48.0)         | -11.97 (148.0)      |
| 4-B          | -12.10 (98.9)                          | -0.14 (1.1)         | 5.08 (106.1)          | -0.29 (-6.1)        | 1.76 (101.1)                          | -0.01 (0.6)        | 0.10 (-4.4)          | -2.35 (104.4)       |
| 5-B          | 2.10 (88.2)                            | 0.28 (11.8)         | -0.55 (144.7)         | 0.17 (-44.7)        | -0.12 (98.4)                          | -0.002 (1.6)       | 0.92 (54.4)          | 0.77 (45.6)         |
| 6-B          | -2.38 (94.4)                           | -0.14 (5.6)         | -1.02 (99.0)          | -0.01 (1.0)         | 0.01                                  | 0.002              | -1.00 (70.9)         | -0.41 (29.1)        |
| 7-B          | 1.63 (97.6)                            | 0.04 (2.4)          | 0.51 (108.5)          | -0.04 (-8.5)        | -0.01                                 | 0.000              | 0.70 (80.5)          | 0.17 (19.5)         |
| 8-B          | -0.46                                  | 0.009               | -0.10                 | 0.03                | 0.001                                 | -0.001             | -0.34 (87.2)         | -0.05 (12.8)        |
| 9-B          | 0.03                                   | -0.003              | 0.03                  | -0.007              | 0.001                                 | 0.000              | 0.09                 | 0.007               |
| 10-B         | 0.000                                  | 0.000               | -0.007                | 0.000               | 0.000                                 | 0.000              | -0.01                | 0.000               |
| <b>Total</b> | <b>-322.69 (103.5)</b>                 | <b>10.83 (-3.5)</b> | <b>-274.05 (95.1)</b> | <b>-13.99 (4.9)</b> | <b>-104.80 (91.4)</b>                 | <b>-9.84 (8.6)</b> | <b>-68.23 (50.8)</b> | <b>-66.2 (49.2)</b> |

| <i>k</i>     | $\text{SO}_4^{2-}(\text{H}_2\text{O})_9$ |                     |                       |                      | $\text{ClO}_4^-(\text{H}_2\text{O})_9$ |                      |                      |                      |
|--------------|------------------------------------------|---------------------|-----------------------|----------------------|----------------------------------------|----------------------|----------------------|----------------------|
|              | Ion Inside                               |                     | Ion Outside           |                      | Ion Inside                             |                      | Ion Outside          |                      |
|              | I-W                                      | W-W                 | I-W                   | W-W                  | I-W                                    | W-W                  | I-W                  | W-W                  |
| 1-B          | 0.58 (17.9)                              | 2.66 (82.1)         | 0.93 (18.2)           | 4.18 (81.8)          | 0.11 (10.3)                            | 0.96 (89.7)          | 0.76 (29.5)          | 1.82 (70.5)          |
| 2-B          | -223.44 (94.3)                           | -13.53 (5.7)        | -185.54 (86.3)        | -29.48 (13.7)        | -90.86 (80.3)                          | -22.33 (19.7)        | -71.32 (63.4)        | -41.24 (36.6)        |
| 3-B          | 46.59 (114.7)                            | -5.97 (-14.7)       | 19.71 (119.9)         | -3.27 (-19.9)        | 15.35 (172.9)                          | -6.47 (-72.9)        | 6.16 (-452.9)        | -7.52 (552.9)        |
| 4-B          | -7.12 (92.6)                             | -0.57 (7.4)         | -1.94 (57.3)          | -1.45 (42.7)         | -2.25 (82.7)                           | -0.47 (17.3)         | -1.05 (38.0)         | -1.71 (62.0)         |
| 5-B          | 0.65 (53.3)                              | 0.57 (46.7)         | 1.27 (58.3)           | 0.91 (41.7)          | 0.26 (39.4)                            | 0.40 (60.6)          | 0.92 (55.1)          | 0.75 (44.9)          |
| 6-B          | 0.28                                     | -0.31               | -0.76 (70.4)          | -0.32 (29.6)         | -0.16 (40.0)                           | -0.24 (60.0)         | -0.48 (63.2)         | -0.28 (36.8)         |
| 7-B          | -0.13                                    | 0.10                | 0.27 (75.0)           | 0.09 (25.0)          | 0.10 (52.6)                            | 0.09 (47.4)          | 0.20 (66.7)          | 0.10 (33.3)          |
| 8-B          | -0.02                                    | -0.004              | -0.06                 | -0.02                | -0.03                                  | -0.01                | -0.05                | -0.03                |
| 9-B          | 0.003                                    | -0.004              | 0.02                  | 0.003                | 0.003                                  | -0.001               | 0.01                 | 0.005                |
| 10-B         | 0.006                                    | 0.000               | -0.004                | 0.000                | 0.002                                  | 0.000                | -0.003               | 0.000                |
| <b>Total</b> | <b>-182.60 (91.5)</b>                    | <b>-17.06 (8.5)</b> | <b>-166.10 (85.0)</b> | <b>-29.37 (15.0)</b> | <b>-77.48 (73.4)</b>                   | <b>-28.07 (26.6)</b> | <b>-64.84 (57.4)</b> | <b>-48.11 (42.6)</b> |

**Table TS3.** Least-mean-squares fitted parameters for the 2-B contribution to the total BSSE correction via equation (8). These fits correspond to the unscaled (I-W) BSSE corrections in Figure FS2.

| <b>System</b>                            | <b><i>a</i></b> | <b><i>b</i></b> | <b><math>x^2</math></b> | <b><math>R^2</math></b> |
|------------------------------------------|-----------------|-----------------|-------------------------|-------------------------|
| $\text{Ca}^{2+}(\text{H}_2\text{O})_9$   | 82643.96        | 1.40            | 0.023                   | 0.967                   |
| $\text{NH}_4^+(\text{H}_2\text{O})_9$    | 35.33           | 0.54            | 0.042                   | 0.992                   |
| $\text{ClO}_4^-(\text{H}_2\text{O})_9$   | 11.13           | 0.32            | 0.174                   | 0.886                   |
| $\text{SO}_4^{2-}(\text{H}_2\text{O})_9$ | 25.06           | 0.36            | 0.143                   | 0.989                   |

**Table TS4.** Cartesian coordinates of the aqueous ionic clusters optimized at the MP2/aVDZ level of theory.

---

**Ca<sup>2+</sup>(H<sub>2</sub>O)<sub>9</sub> ion inside**

---

|    |             |             |             |
|----|-------------|-------------|-------------|
| O  | -0.03401470 | 2.38203492  | -0.53809149 |
| H  | 0.76167746  | 2.90055005  | -0.72696050 |
| H  | -0.71340449 | 3.03643609  | -0.32011223 |
| O  | 4.11334421  | 0.11902460  | 1.25212914  |
| H  | 4.79850669  | -0.56772484 | 1.24987432  |
| H  | 4.54522675  | 0.87896755  | 1.67283178  |
| O  | 0.03401470  | -2.38203492 | -0.53809149 |
| H  | -0.76167746 | -2.90055005 | -0.72696050 |
| H  | 0.71340449  | -3.03643609 | -0.32011223 |
| O  | -2.28580328 | -0.42982134 | -0.84906205 |
| H  | -3.08344113 | -0.38258890 | -0.28415281 |
| H  | -2.60595992 | -0.46883183 | -1.76054513 |
| O  | 1.40458315  | -0.44305392 | 1.71611538  |
| H  | 2.37509119  | -0.32401541 | 1.76065310  |
| H  | 1.15198424  | -0.84271584 | 2.55954920  |
| O  | 2.28580328  | 0.42982134  | -0.84906205 |
| H  | 2.60595992  | 0.46883183  | -1.76054513 |
| H  | 3.08344113  | 0.38258890  | -0.28415281 |
| O  | 0.00000000  | 0.00000000  | -2.68192605 |
| H  | 0.15345193  | -0.75182769 | -3.27338633 |
| H  | -0.15345193 | 0.75182769  | -3.27338633 |
| O  | -1.40458315 | 0.44305392  | 1.71611538  |
| H  | -2.37509119 | 0.32401541  | 1.76065310  |
| H  | -1.15198424 | 0.84271584  | 2.55954920  |
| O  | -4.11334421 | -0.11902460 | 1.25212914  |
| H  | -4.54522675 | -0.87896755 | 1.67283178  |
| H  | -4.79850669 | 0.56772484  | 1.24987432  |
| Ca | 0.00000000  | 0.00000000  | -0.19776074 |

---



---

**Ca<sup>2+</sup>(H<sub>2</sub>O)<sub>9</sub> ion outside**

---

|    |             |             |             |
|----|-------------|-------------|-------------|
| Ca | -0.67021412 | 1.70269630  | 0.13940692  |
| O  | 0.20084704  | -2.33354517 | -0.05688644 |
| H  | -0.56133079 | -2.46998149 | -0.64475609 |
| H  | 0.75524001  | -3.14882190 | -0.14649850 |
| O  | -2.21585911 | -1.86571801 | -1.79357745 |
| H  | -2.08529684 | -2.12800072 | -2.71927829 |
| H  | -3.01430481 | -2.34998891 | -1.52735671 |
| O  | -2.27399835 | 0.84374682  | -1.30525021 |
| H  | -2.30824771 | -0.11579457 | -1.54050896 |

---



|   |             |             |             |
|---|-------------|-------------|-------------|
| H | -3.03008970 | 1.24376879  | -1.75913608 |
| O | -1.25084759 | 0.97203606  | 2.21079034  |
| H | -1.80715093 | 1.26083331  | 2.94708834  |
| H | -0.87101943 | 0.07997647  | 2.47318548  |
| O | 3.21949799  | 1.88093666  | -0.83751867 |
| H | 3.64416289  | 1.95005753  | -1.70755286 |
| H | 3.96141723  | 1.92009846  | -0.21277058 |
| O | 0.93987736  | 3.30914237  | -0.30588970 |
| H | 1.84422046  | 2.97833039  | -0.52061130 |
| H | 1.00055234  | 4.27536983  | -0.30552511 |
| O | 0.94423207  | 0.19186150  | -0.35848038 |
| H | 0.85451543  | -0.79685154 | -0.30016820 |
| H | 1.87002554  | 0.41486167  | -0.56108465 |
| O | -0.10164026 | -1.33301647 | 2.55894189  |
| H | -0.10130687 | -1.90592199 | 3.33766998  |
| H | -0.06156275 | -1.91462300 | 1.77511754  |
| O | 1.70430295  | -4.56457660 | -0.21801813 |
| H | 2.40859384  | -4.79096875 | -0.84066051 |
| H | 1.57534058  | -5.36283223 | 0.31272710  |

---



---

**NH<sub>4</sub><sup>+</sup>(H<sub>2</sub>O)<sub>9</sub> ion inside**

---

|   |             |             |             |
|---|-------------|-------------|-------------|
| N | 0.18231854  | -0.19063081 | 0.14139222  |
| H | 0.48464987  | -0.86815184 | -0.58131753 |
| H | 0.95167223  | -0.04105538 | 0.81849667  |
| H | -0.64690789 | -0.56311103 | 0.63776948  |
| H | -0.06014000 | 0.70979513  | -0.30937971 |
| O | 1.00637115  | -2.03982788 | -1.82890977 |
| H | 1.69333164  | -1.88612476 | -2.49411949 |
| H | 0.67243727  | -2.92987647 | -2.01423336 |
| O | 2.28076131  | 0.21734213  | 1.98822152  |
| H | 2.62107172  | -0.44294713 | 2.60971154  |
| H | 2.79563226  | 1.01813661  | 2.16620836  |
| O | -0.47899676 | 2.26531673  | -1.08810613 |
| H | -0.88374028 | 3.02609083  | -0.64601003 |
| H | -0.38571430 | 2.53369401  | -2.01401915 |
| O | -2.08003219 | -1.20272730 | 1.49716224  |
| H | -2.95861569 | -1.33070415 | 1.11017884  |
| H | -2.17244793 | -1.47061424 | 2.42330425  |
| O | 3.04397219  | -1.48996687 | -3.70094247 |
| H | 2.92109150  | -1.30388697 | -4.64344861 |
| H | 3.92920827  | -1.87734823 | -3.63509623 |
| O | 3.69834974  | 2.61508733  | 2.43535939  |
| H | 4.62049612  | 2.78873706  | 2.19549440  |
| H | 3.52540161  | 3.18724995  | 3.19743680  |
| O | -0.18092911 | 2.92651994  | -3.81439228 |

|   |             |             |             |
|---|-------------|-------------|-------------|
| H | 0.46069088  | 3.54964270  | -4.18599021 |
| H | -0.92713491 | 2.93687552  | -4.43173581 |
| O | -4.58772420 | -1.55980204 | 0.25512783  |
| H | -5.37617914 | -1.01338388 | 0.38857959  |
| H | -4.92650659 | -2.43302937 | 0.00866523  |
| O | -2.23572476 | -1.93147987 | 4.21807206  |
| H | -2.31505884 | -2.83168407 | 4.56647073  |
| H | -2.65370732 | -1.36677561 | 4.88473789  |

---



---

**NH<sub>4</sub><sup>+</sup>(H<sub>2</sub>O)<sub>9</sub> ion outside**

---

|   |             |             |             |
|---|-------------|-------------|-------------|
| H | -2.90191463 | 1.69394429  | -1.43152441 |
| H | -1.41950336 | 0.83830313  | -1.31173726 |
| H | -1.88222318 | 1.97823148  | -0.11392955 |
| H | -2.67615745 | 0.49825030  | -0.25773816 |
| N | -2.23630971 | 1.27064292  | -0.78491971 |
| O | -0.83690003 | 2.78882848  | 1.13163332  |
| H | -0.06761287 | 3.04162255  | 0.56173011  |
| H | -1.00521637 | 3.54026115  | 1.71562176  |
| O | 1.04520273  | 3.04930281  | -0.73638345 |
| H | 1.64839738  | 2.28474103  | -0.84411966 |
| H | 1.55150746  | 3.82525010  | -1.00902999 |
| O | -0.94319455 | -2.63196604 | -0.95864259 |
| H | -1.23055327 | -3.34272282 | -1.54783370 |
| H | -0.11519094 | -2.96478007 | -0.52422927 |
| O | 2.32394905  | 0.59505097  | -1.03196591 |
| H | 3.12329326  | 0.41379086  | -1.54468460 |
| H | 2.42933731  | 0.10195819  | -0.18512712 |
| O | 1.39655675  | -3.21880745 | 0.19373635  |
| H | 1.64369372  | -4.01275811 | 0.68446505  |
| H | 1.76043400  | -2.46295807 | 0.69956042  |
| O | -2.49951031 | -1.13136675 | 0.71387118  |
| H | -2.04908073 | -1.80816011 | 0.15485681  |
| H | -3.17436040 | -1.61099013 | 1.21328493  |
| O | -0.24954895 | 0.14062445  | 2.01949060  |
| H | -1.04251397 | -0.34205280 | 1.72351593  |
| H | -0.44622674 | 1.08443695  | 1.87289097  |
| O | -0.25433523 | -0.07632413 | -1.97743162 |
| H | 0.68031791  | 0.11226059  | -1.76017977 |
| H | -0.38750943 | -1.02173933 | -1.76696021 |
| O | 2.14196035  | -0.78197025 | 1.33107308  |
| H | 1.26993915  | -0.42962842 | 1.65847092  |
| H | 2.75298273  | -0.69756988 | 2.07577147  |

---



---

**SO<sub>4</sub><sup>2-</sup>(H<sub>2</sub>O)<sub>9</sub> ion inside**

---

|   |             |             |             |
|---|-------------|-------------|-------------|
| S | 0.00000000  | -0.00000000 | -0.59461648 |
| O | 1.45152438  | -0.00086739 | -1.08877596 |
| O | -0.72651337 | -1.25662329 | -1.08877596 |
| O | 0.00000000  | 0.00000000  | 0.96337313  |
| O | -0.72501101 | 1.25749069  | -1.08877596 |
| O | -2.63232864 | -0.50305014 | 1.88730102  |
| H | -1.68695646 | -0.37629483 | 1.64494688  |
| H | -2.97460127 | -0.99514853 | 1.11782859  |
| O | 0.22854183  | -3.67113826 | -0.00586527 |
| H | -0.19242089 | -2.87343557 | -0.40060255 |
| H | 0.58137035  | -3.30561078 | 0.82831319  |
| O | -3.53348316 | -1.15011640 | -0.88399614 |
| H | -3.64364786 | -0.18350106 | -0.79771192 |
| H | -2.56834445 | -1.22131871 | -1.06251067 |
| O | 3.06502808  | 2.03349216  | -0.00586527 |
| H | 2.58467864  | 1.27007641  | -0.40060255 |
| H | 2.57205774  | 2.15628689  | 0.82831319  |
| O | 1.75181852  | -2.02813841 | 1.88730102  |
| H | 1.16935911  | -1.27279973 | 1.64494688  |
| H | 2.34912455  | -2.07850600 | 1.11782859  |
| O | 0.88051012  | 2.53118855  | 1.88730102  |
| H | 0.62547672  | 3.07365454  | 1.11782859  |
| H | 0.51759734  | 1.64909456  | 1.64494688  |
| O | 2.76277160  | -2.48502798 | -0.88399614 |
| H | 1.98074051  | -3.06374108 | -0.79771192 |
| H | 2.34186526  | -1.61359218 | -1.06251067 |
| O | -3.29356991 | 1.63764610  | -0.00586527 |
| H | -3.15342809 | 1.14932390  | 0.82831319  |
| H | -2.39225775 | 1.60335916  | -0.40060255 |
| O | 0.77071156  | 3.63514439  | -0.88399614 |
| H | 0.22647919  | 2.83491090  | -1.06251067 |
| H | 1.66290735  | 3.24724213  | -0.79771192 |

---



---

**SO<sub>4</sub><sup>2-</sup>(H<sub>2</sub>O)<sub>9</sub> ion outside**

---

|   |             |             |             |
|---|-------------|-------------|-------------|
| O | 1.21797968  | -0.49966788 | 1.11320746  |
| S | 1.26813101  | -1.23103751 | -0.25395744 |
| O | 1.49573967  | -2.72329446 | -0.02564417 |
| O | 2.36208424  | -0.63347501 | -1.12877590 |
| O | -0.12070806 | -1.03909450 | -0.94375297 |
| H | -1.69196617 | 1.46131074  | 0.67848716  |
| O | -1.33483925 | 2.34653829  | 0.44191659  |
| H | -0.36598146 | 2.24089981  | 0.58195772  |
| H | -0.59340318 | 0.40275268  | -1.83934557 |
| O | -0.97511472 | 1.24100733  | -2.20581994 |
| H | -1.15255838 | 1.75441813  | -1.38931021 |

|   |             |             |             |
|---|-------------|-------------|-------------|
| H | -1.44604860 | -3.11694523 | -0.04089329 |
| O | -0.95510586 | -3.74778604 | 0.50822501  |
| H | -0.02283752 | -3.47054413 | 0.29426272  |
| H | -0.83065339 | -2.59394705 | 2.10924496  |
| O | -0.73242990 | -1.80065886 | 2.67339773  |
| H | 0.03256191  | -1.35011179 | 2.24081805  |
| H | -1.38609183 | -0.60471738 | 0.10452801  |
| O | -2.15182402 | -0.34462591 | 0.68721664  |
| H | -1.88563601 | -0.76640381 | 1.53114226  |
| H | 0.97122484  | 1.83783871  | -2.27516437 |
| O | 1.90853535  | 1.91019770  | -2.01296107 |
| H | 2.11679637  | 0.97333005  | -1.76245503 |
| H | 1.70970333  | 2.23784050  | -0.17206956 |
| O | 1.45257054  | 2.19369999  | 0.77529491  |
| H | 1.45892110  | 1.21622870  | 0.95653816  |
| H | -0.64703004 | 4.00312003  | 1.81029368  |
| O | 0.17924954  | 4.37510189  | 2.15922197  |
| H | 0.81929562  | 3.72389593  | 1.81072339  |
| H | -3.43934712 | -0.11995096 | -0.84973866 |
| O | -3.72593391 | 0.14161238  | -1.74338273 |
| H | -2.89846244 | 0.51321220  | -2.10302059 |

---

**ClO<sub>4</sub><sup>-</sup>(H<sub>2</sub>O)<sub>9</sub> ion inside**

---

|    |             |             |             |
|----|-------------|-------------|-------------|
| Cl | 0.00000000  | 0.00000000  | -0.68699979 |
| O  | 1.41695761  | 0.00063831  | -1.17984485 |
| O  | -0.70792601 | -1.22744044 | -1.17984485 |
| O  | 0.00000000  | 0.00000000  | 0.82978920  |
| O  | -0.70903160 | 1.22680213  | -1.17984485 |
| O  | -2.78491486 | -0.59952545 | 1.88595428  |
| H  | -1.82911976 | -0.59119680 | 1.71652552  |
| H  | -3.14106404 | -1.06516125 | 1.10372872  |
| O  | 0.35212831  | -3.77172006 | 0.11713970  |
| H  | -0.20898597 | -3.07960887 | -0.26792308 |
| H  | 0.69797648  | -3.34198853 | 0.92495513  |
| O  | -3.72727459 | -1.13535286 | -0.80781407 |
| H  | -3.80533233 | -0.16386812 | -0.72238311 |
| H  | -2.83803803 | -1.24227330 | -1.18162364 |
| O  | 3.09034124  | 2.19081209  | 0.11713970  |
| H  | 2.77151250  | 1.35881727  | -0.26792308 |
| H  | 2.54525873  | 2.27545963  | 0.92495513  |
| O  | 1.91166170  | -2.11204429 | 1.88595428  |
| H  | 1.42655133  | -1.28846578 | 1.71652552  |
| H  | 2.49298873  | -2.18766063 | 1.10372872  |
| O  | 0.87325316  | 2.71156974  | 1.88595428  |
| H  | 0.64807532  | 3.25282188  | 1.10372872  |

|   |             |             |             |
|---|-------------|-------------|-------------|
| H | 0.40256844  | 1.87966258  | 1.71652552  |
| O | 2.84688172  | -2.66023805 | -0.80781407 |
| H | 2.04458012  | -3.21358041 | -0.72238311 |
| H | 2.49485925  | -1.83667638 | -1.18162364 |
| O | -3.44246954 | 1.58090797  | 0.11713970  |
| H | -3.24323521 | 1.06652890  | 0.92495513  |
| H | -2.56252653 | 1.72079159  | -0.26792308 |
| O | 0.88039288  | 3.79559092  | -0.80781407 |
| H | 0.34317878  | 3.07894968  | -1.18162364 |
| H | 1.76075221  | 3.37744853  | -0.72238311 |

---



---

**ClO<sub>4</sub>(H<sub>2</sub>O)<sub>9</sub> ion outside**

---

|    |             |             |             |
|----|-------------|-------------|-------------|
| O  | 1.66636734  | -0.03145681 | 1.34667349  |
| Cl | 1.68338717  | -0.91838825 | 0.13587299  |
| O  | 1.95638387  | -2.32723270 | 0.53663927  |
| O  | 2.69129501  | -0.43376801 | -0.85781046 |
| O  | 0.29750862  | -0.86683457 | -0.51435696 |
| H  | -2.04721427 | 1.51341523  | 0.88709363  |
| O  | -1.80564674 | 2.25221369  | 0.30071538  |
| H  | -0.84325149 | 2.37548646  | 0.46731589  |
| H  | -0.65800557 | 0.27415063  | -1.69789444 |
| O  | -1.23468762 | 0.92860289  | -2.13179477 |
| H  | -1.53528588 | 1.47091100  | -1.36715063 |
| H  | -2.00501379 | -2.72462596 | -1.03954078 |
| O  | -1.30399898 | -3.37754783 | -0.82457063 |
| H  | -0.49772125 | -2.85320832 | -0.95806960 |
| H  | -1.11364247 | -3.30220992 | 1.03790098  |
| O  | -0.91221699 | -3.04636879 | 1.96548311  |
| H  | 0.04381834  | -2.88647525 | 1.92982998  |
| H  | -1.02983049 | -0.44701104 | 0.79143738  |
| O  | -1.85863100 | -0.44916071 | 1.30812323  |
| H  | -1.73955582 | -1.28172253 | 1.81050155  |
| H  | 0.59954501  | 1.76851763  | -2.37306993 |
| O  | 1.50597712  | 2.02825300  | -2.11976129 |
| H  | 1.93631636  | 1.18127396  | -1.90625001 |
| H  | 1.20876237  | 2.59217687  | -0.40371878 |
| O  | 0.93445991  | 2.68395358  | 0.53700436  |
| H  | 1.28394232  | 1.87187082  | 0.94615621  |
| H  | -1.46002491 | 4.39784773  | 1.21620433  |
| O  | -0.71497127 | 4.95599904  | 1.48487014  |
| H  | 0.04231785  | 4.38220446  | 1.28053071  |
| H  | -2.88833863 | -0.91168210 | -0.25123561 |
| O  | -3.13470178 | -1.22306129 | -1.14611113 |
| H  | -2.74093303 | -0.54373576 | -1.72128100 |

---
